# Supplementary material for: Anodal block permits directional vagus nerve stimulation
Source: PubMed Central journal article supplement (PMC7280203; doi:10.1038/s41598-020-66332-y), 2020-06-08
Supplement: 41598_2020_66332_MOESM1_ESM.pdf [file 41598_2020_66332_MOESM1_ESM.pdf]

1 Anodal block permits directional vagus nerve stimulation

2 **Umair Ahmed<sup>1#</sup>, Yao-Chuan Chang<sup>1#</sup>, Marina Cracchiolo<sup>1,2</sup>, Maria F. Lopez<sup>1</sup>, Jacquelyn N.**  
3 **Tomaio<sup>1</sup>, Timir Datta-Chaudhuri<sup>1</sup>, Theodoros P. Zanos<sup>1</sup>, Loren Rieth<sup>1</sup>, Yousef Al-Abed<sup>1</sup>,**  
4 **Stavros Zanos<sup>1\*</sup>**

5 <sup>1</sup> Institute of Bioelectronic Medicine, Feinstein Institutes for Medical Research, Manhasset NY  
6 11030, USA

7 <sup>2</sup> Biorobotics Institute, Scuola Superiore Sant'Anna, Pisa, Italy

8 #: These 2 investigators contributed equally to this work

9 \* Corresponding author: Stavros Zanos, szanos@northwell.edu

10

11 **Supplementary Figure**

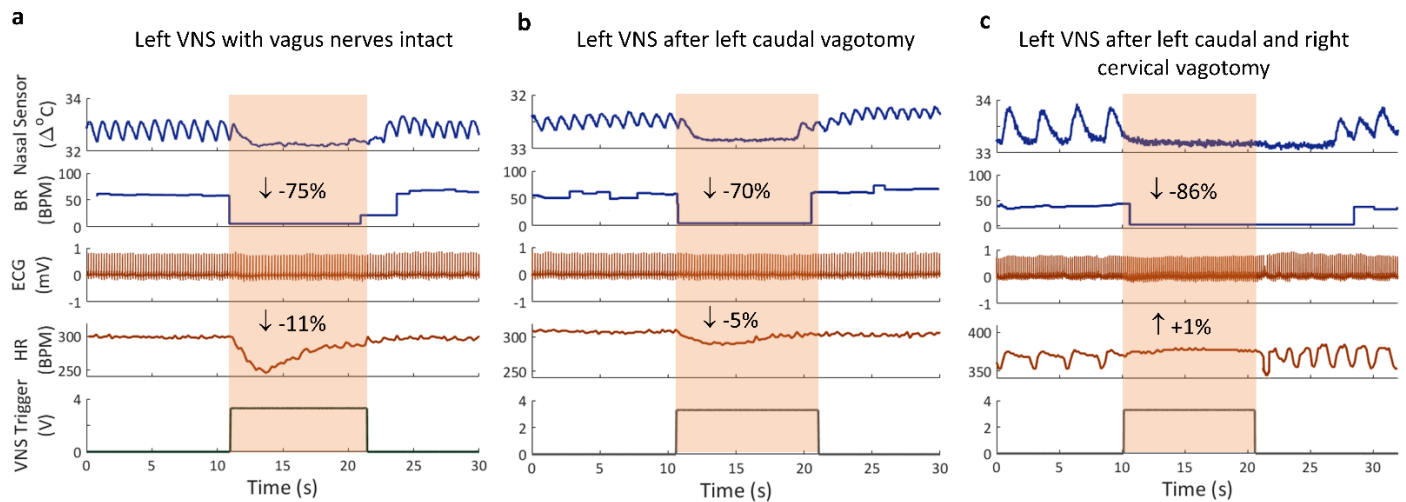

12

13 **Figure S1. Changes in breathing rate and heart rate after unilateral and bilateral**

14 **vagotomy.**

15 a) Acute physiological effects of left cervical VNS (intensity  $500 \mu\text{A}$ , pulse width  $100 \mu\text{s}$ , pulsing  
16 frequency 30 Hz) with intact left and right vagus. Decreases in breathing rate (BR, -75%) and  
17 heart rate (HR, -11%) are observed during VNS.

18 b) After left caudal vagotomy (unilateral vagotomy) in the same animal, the effect of left VNS  
19 with the same parameters on HR diminishes (-5%), whereas effects on BR remains intact (-  
20 70%).

21 c) After left caudal and right cervical vagotomy (bilateral vagotomy) in the same animal,  
22 the effect of left VNS with the same parameters on HR disappears (+1%), whereas effects on  
23 BR remains intact (-86%).
